# Supplementary material for: Transcriptional control of DNA replication licensing by Myc
Source: PubMed Central journal article supplement — Sci Rep. 2013 Dec 6;3:3444. doi: 10.1038/srep03444 (PMC3853707; doi:10.1038/srep03444), 2013-12-06
Supplement: srep03444-s1.pdf [file srep03444-s1.pdf]

## Transcriptional control of DNA replication licensing by Myc

Taras Valovka, Manuela Schönfeld, Philipp Raffeiner, Kathrin Breuker, Theresia Dunzendorfer-Matt, Markus Hartl & Klaus Bister

### SUPPLEMENTARY INFORMATION

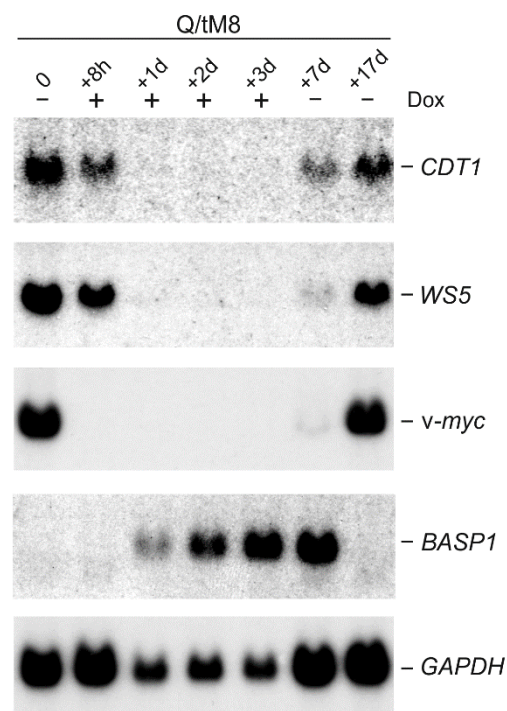

**Supplementary Figure 1.** Northern analysis of *CDT1* expression in the cell line Q/tM8 conditionally transformed by a *v-myc* allele controlled by a doxycycline-inhibited transactivator.<sup>32</sup> Cells were first grown continuously in the absence (-) of doxycycline, at day 0 the drug was added (+), removed again after 3 days, and the cells were incubated for further 14 days. RNAs were isolated before addition or removal of the drug, and at the time points indicated. Filters were hybridized with the indicated <sup>32</sup>P-labeled cDNA probes: quail *CDT1*, *WS5*, and *GAPDH*, chicken *BASP1*, and MC29 *v-myc*. Sizes of the mRNAs were: *CDT1*, 2.5 kb; *WS5*, 2.8 kb; *BASP1*, 2.0 kb; *v-myc*, 1.9 kb; *GAPDH*, 1.4 kb. In the Q/tM8 cell line, inactivation of the transforming *v-myc* allele by doxycycline leads to retarded cell growth and downregulation of the glycolytic control gene *GAPDH* as observed previously.<sup>32</sup> Equal RNA loading is verified by ethidium bromide staining.

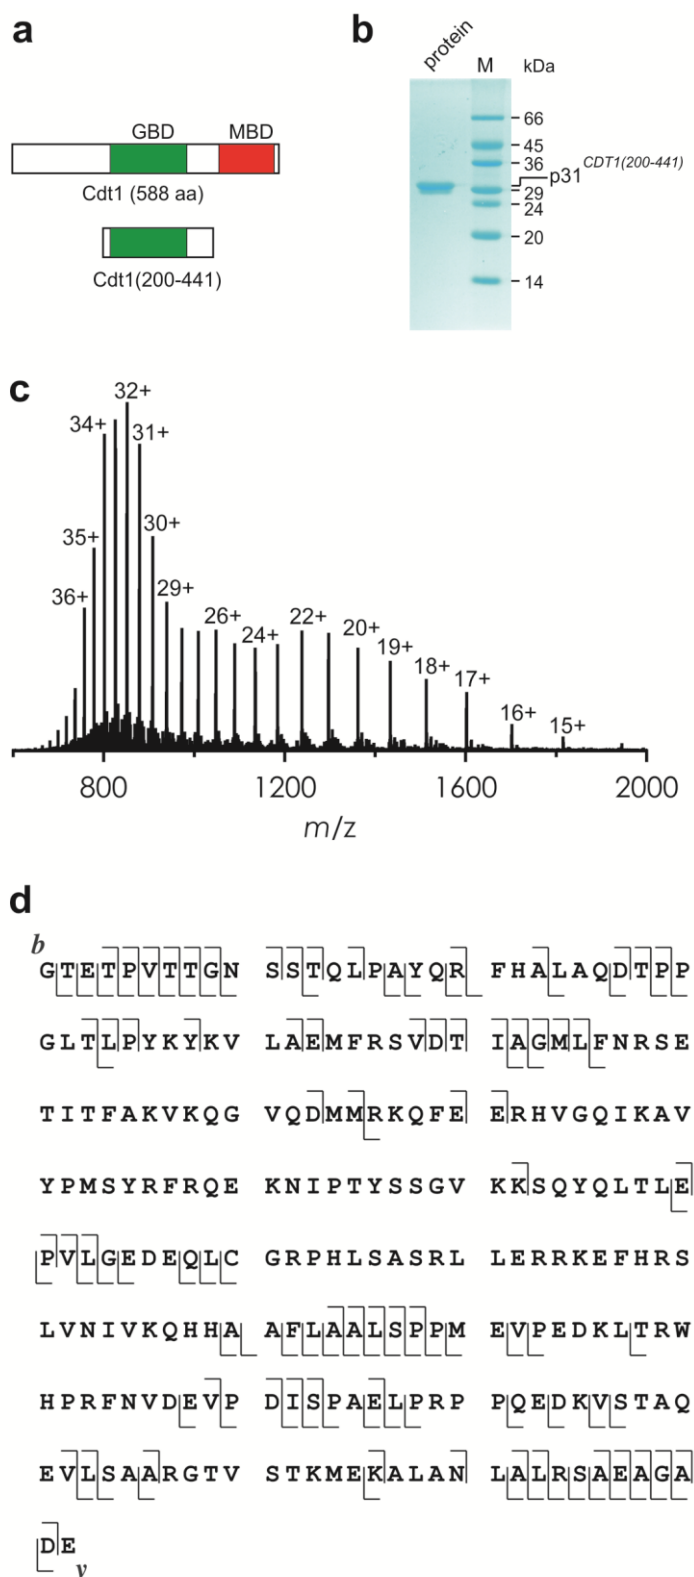

**Supplementary Figure 2.** Recombinant quail Cdt1(200-441) protein. **(a)** Schematic structure of the 242-amino acid recombinant Cdt1(200-441) protein in comparison to the 588-amino acid full-length quail Cdt1 protein (GBD, geminin binding domain; MBD, MCM binding domain). **(b)** SDS-PAGE (15% wt/vol) analysis of 1.5 µg of bacterially expressed and purified Cdt1(200-441) stained with Coomassie brilliant blue. **(c)** Electrospray ionization (ESI) mass spectrum of the Cdt1(200-441) protein recorded on a Fourier transform ion cyclotron resonance (FT-ICR) mass spectrometer. **(d)** Map of fragment ions from collisionally activated dissociation (CAD), illustrating 40% sequence coverage. Using the  $y_2$  to  $y_{10}$  fragment ions from CAD of  $(M + 32H)^{32+}$  protein ions as internal calibrants (error 0.5 ppm), a value of 27217.01 Da was deduced for the mass (most abundant isotopic peak) of the Cdt1(200-441) protein (theoretical mass: 27217.04 Da).

|                 |                                                                                                       |     |
|-----------------|-------------------------------------------------------------------------------------------------------|-----|
| Cdt1 q          | MAQLRLTDFFGRTKTAVSITGKHGTRAHKAAILTPPGSRNDGAVPTPPASPRTPTRSAAAPQIPRVAGRKRSRREMEGETPGGERGGKSARKRLELPRDAG | 100 |
| Cdt1 ck         | MAQLRLTDFFGRTKAAVSLPAKHGARGLKAALVAPPEPRNHGAVSPPPASPRTPTRSAAAPVPRMAGRKRSRREMEGETPGGERGGKSARKRLELPRDAG  | 100 |
| Cdt1 m          | MAQSRVTDIFYACRRPG-----LTPRAKSI CLTPSPGGLVAPAFTRSSSRKRARPPAEPGSDQAPLARRRLRLPGLDSCPSSLPEPSSPAEPSPPADP   | 94  |
| Cdt1 h          | MEQRRVTDIFYARRRPGP---PRIAP-PKLACTRPSARPALRAPASATSGSRKRARPPAAPGRDQARPPARRRLRLS-----VDEVSSP-----        | 80  |
|                 |                                                                                                       |     |
| Cdt1 q          | PEPASPPSLAQLQPPPTASRTPCIPSLQNSGTTPRLEQEELAAQLSRLQRMRMKPPPTQAPPVPAGVGAELRSRLQSLRGLQRLRAKAAAGNGTQGHVGTG | 200 |
| Cdt1 ck         | PEPASPTSLGPPQPIASRLCTPSPEDSGTTPRLEQEELATLQSLRQRMRMKPP-TQPPPIPAGVGAELRSRLQSLRGLQRLRAKAAAGSGTGQPGVGTG   | 199 |
| Cdt1 m          | SPPADPGSPVCPSPVKRTKSTTVYVGGQPGKIPSED--SVSELOSLCRRARKLGAQARALARARVQENAVEPSTPAKVPTEQPVEKAP-----         | 181 |
| Cdt1 h          | STPEAPDIPACPSPGQIKKSTPAAGQPPHLTSAQDQDTISELASCLQRARELGARVRAKASAQD-AGESCTPEAEGRPPEPCGEKAP-----          | 168 |
|                 |                                                                                                       |     |
| Cdt1 q          | TETPVTGNSSTQLFAAYQRFHALAQDTPPGLTLPLYKYKVLAEFRSVDTIAGMLFNRAETITFAKVKQGVQDMMRKQFEERHVGQIKAVYFMSYRFRQEK  | 300 |
| Cdt1 ck         | TEAPIAAQN-STQLFAAYQRFHALAQDTPPGLTLPLYKYKVLAEFRSVDTIAGMLFNRAETITFAKVKQGVQDMMRKQFEERHVGQIKAVYFMSYRFRQEK | 298 |
| Cdt1 m          | -----FAAYQRFHALAQDPLGLVLPYKYQVLVEMFRSMDTIVSMLHNRSETVTFKVKQGVQEMMRKFEERNVGQIKTVYFMSYRFRQEK             | 266 |
| Cdt1 h          | -----FAAYQRFHALAQDPLGLVLPYKYQVLVEMFRSMDTIVGMLHNRSETPTFAKVRQGVQDMRRRFEERNVGQIKTVYFMSYRFRQEK            | 253 |
| geminin binding |                                                                                                       |     |
| Cdt1 q          | NIPTYSSGVKKSQYQLTLEPVLGEDEQLCGRPHLSASRLLERRKEFHRSLVNIIVKQHHAFLAALSPPMEVPEDKLTRWHPRFNVDEVDPDISPAELRPP  | 400 |
| Cdt1 ck         | NIPTYSSGVKKSQYQLTLEPVLGEDEQLCGRPHLSASRLLERRKEFHRSLVNIIVKQHHAFLAALSPPMEVPEDKLTRWHPRFNVDEVDPDISPAELRPP  | 398 |
| Cdt1 m          | NVPTFKDSIKRSDYQLTIEPLLGQEA-G-GATQLTATCLLQRRQVFRQNLVERVKEQHKVFLASLNPMAVPPDQLTRWHPRFNVDEVDPDIEPAELRPP   | 364 |
| Cdt1 h          | SVPTFKDARRSDYQLTIEPLLEQEADG-AAPQLTASRLLRQRIFSQKLVEHVKEHHKAFSLSPAMVPEDKLTRWHPRFNVDEVDPDIEPAELRPP       | 352 |
|                 |                                                                                                       |     |
| Cdt1 q          | QEDKVSTAQEVLSAARGTVSTKMEKALANLALRSAEAG-----ADEPALSKAASPASTSSALKGVSQALLERIRAKEARRLQVLMTRAVEQEERLAMMG   | 494 |
| Cdt1 ck         | QEDRVSTAQEVLSAARGTMSTKMEKALANLALRSAEAG-----VEEPALSKAASPASTSSALKGVSQALLERIRAKEARRLQALMTREMGEERLAMMG    | 492 |
| Cdt1 m          | VTEKLTTAQEVILARARSLMTPKMEKALSNLALRSAPGSPGTSTPPLPATPPATPPAASPALKGVSQALLERIRAKEVQQLARMTTRCPEQELRLQRL    | 464 |
| Cdt1 h          | ATEKLTTAQEVILARARNLISPRMEKALSQALALRSAPSSPGSPRALPATPPATPPAASPALKGVSQDLEIRIRAKEAQQLAQMTRCPEQEQRLQRL     | 452 |
| MCM binding     |                                                                                                       |     |
| Cdt1 q          | RLPAMARILRGVVFVAEKKPALPMEELLCARMVDSYPTEMAAGEMEKLRLLAELLPDVWTFHAI RADTYMKLDKNVDLSLVTERLEKAAKEAEAH      | 588 |
| Cdt1 ck         | RLPAMARILRGVVFVAEKKPALPMEELLCARMVDSYPTEMAAGEMEKLRLLAELLPDVWTFHAI RADTYMKLDKNVDLSLVTERLEKAAKEAEAL      | 586 |
| Cdt1 m          | RLPELARVLRNVFVSRKPALTMVVCAARMVDSQCTALS PGEMEKHLVLLAELLPDWLSLHRI RTDTYVKLDKAVDLAGLTARLAHHVHAE-GL       | 557 |
| Cdt1 h          | RLPELARVLRNVFVSRKPALTMVVCAARMVDSCTIMSPGEMEKHLVLLAELLPDWLSLHRI RTDTYVKLDKAAADLAHITARLAHQTRAEGL         | 546 |

**Supplementary Figure 3.** Amino acid sequence of the quail Cdt1 protein and alignment with its chicken (ck), mouse (m), and human (h) orthologs (GenBank accession nos.: q Cdt1, ADX62069; ck Cdt1, XP\_423919; m Cdt1, NP\_080290; h Cdt1, BAB61878). Identical residues are shaded in blue, gaps are indicated by dashes. The binding domains for geminin and the minichromosome maintenance (MCM) complex are indicated by green and red boxes, respectively. The alignment was generated using the ClustalW algorithm with additional manual adjustments.

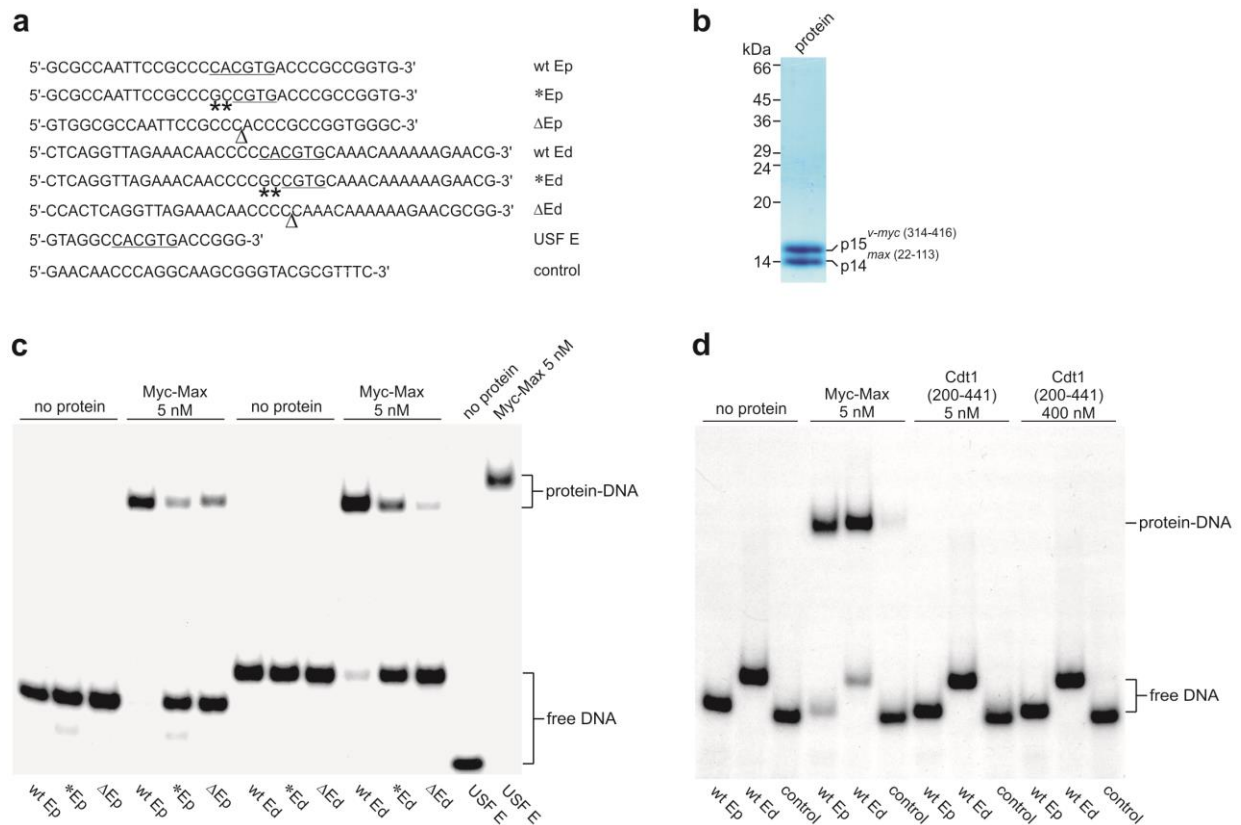

**Supplementary Figure 4.** *In vitro* DNA binding of recombinant Myc-Max proteins to *CDT1* promoter fragments. **(a)** Sequences of the upper strands of double-stranded oligodeoxynucleotides containing the wild type (wt) proximal (p) or distal (d) canonical E-box (E) motifs (CACGTG) present in the quail *CDT1* promoter (cf. Figure 2), or of mutant derivatives in which the E-box motifs were mutated (\*) or deleted ( $\Delta$ ). Oligodeoxynucleotides containing a consensus Myc/Max binding site (USF E), or a random sequence (control) were used as controls. **(b)** SDS-PAGE (14% wt/vol) of a 2- $\mu$ g aliquot of purified recombinant chicken Myc p15 in complex with chicken Max p14 stained with Coomassie brilliant blue. **(c, d)** Electrophoretic mobility shift assays (EMSA) using the Myc-Max protein complex (5 nM) shown in **b** and 0.1-ng (25000 cpm) aliquots of the [ $^{32}$ P]-radiolabeled double-stranded oligodeoxynucleotides shown in **a**. The recombinant quail Cdt1(200-441) protein (5 nM, 400 nM) was used as a control. Electrophoresis was on native polyacrylamide gels (6% wt/vol).

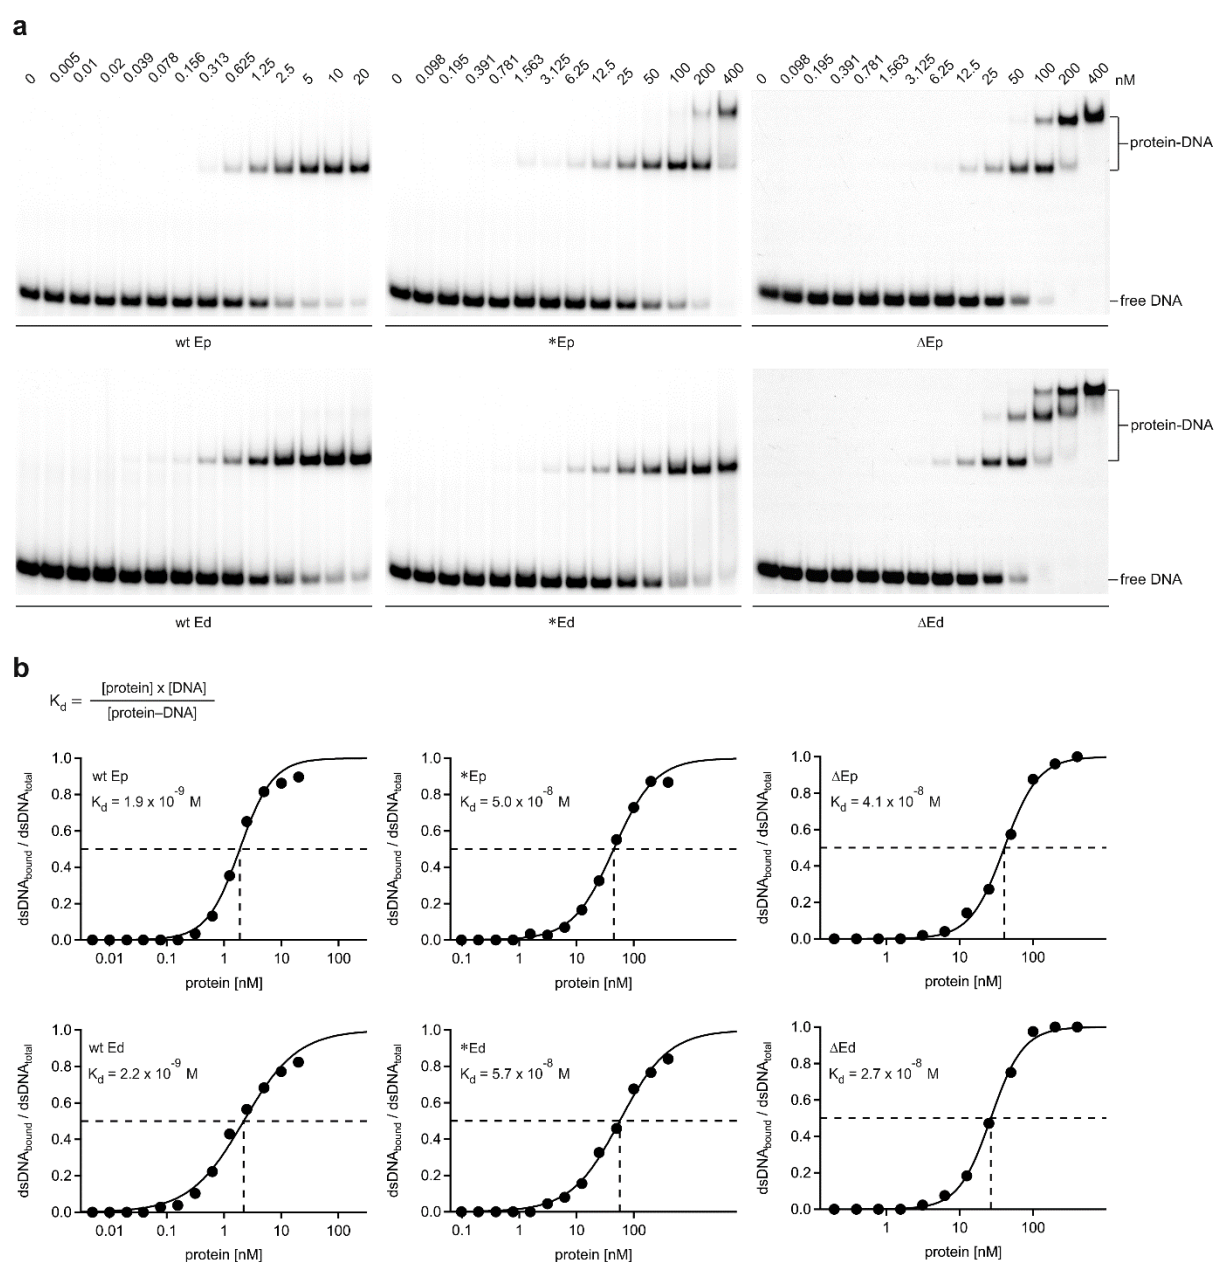

**Supplementary Figure 5.** Determination of the dissociation constants ( $K_d$ ) of protein-DNA complexes by EMSA analysis. **(a)** Titration of 0.1-ng (25000 cpm) aliquots of [ $^{32}$ P]-labeled double-stranded (ds) oligodeoxynucleotides described in Supplementary Figure 4 with increasing amounts of the chicken Myc p15/Max p14 complex. Total protein concentrations are indicated at the top. **(b)** The ratio of bound dsDNA to total dsDNA was determined by phosphorimaging and plotted versus protein concentration. The sigmoidal fit function  $f(x) = 1/\{1 + \exp [(a-x)/b]\}$  was used to generate the binding curves. Calculated  $K_d$  values for the protein-DNA binding reactions are indicated.

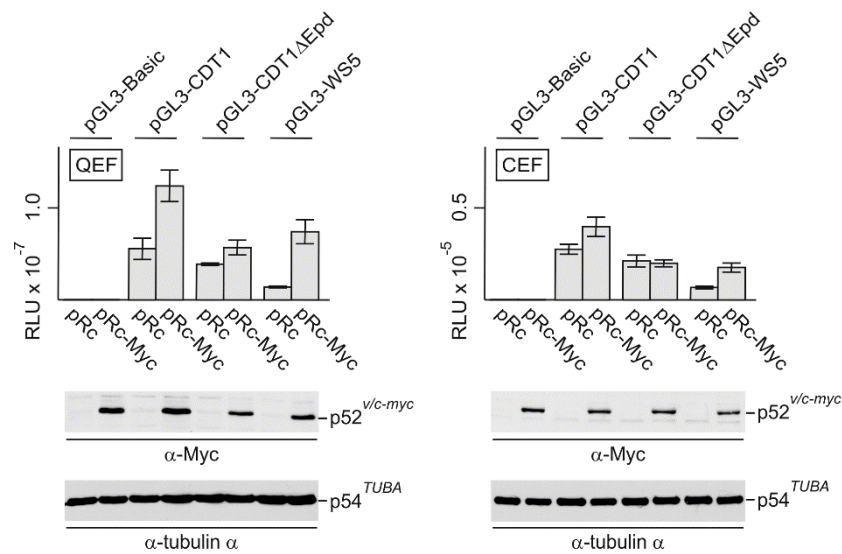

**Supplementary Figure 6.** Deletion analysis of the *CDT1* promoter. Aliquots (2.0  $\mu\text{g}$ ) of the pGL3-Basic vector, or of the reporter constructs pGL3-CDT1, pGL3-WS5, or pGL3-CDT1 $\Delta$ Epd (in which both Myc binding sites have been deleted) were cotransfected with 2.0- $\mu\text{g}$  aliquots of a pRc-derived expression vector encoding the v-Myc protein (pRc-Myc) or of the empty expression vector (pRc), together with the pSV- $\beta$ -galactosidase plasmid (1.0  $\mu\text{g}$ ) into  $8 \times 10^5$  normal QEF or CEF. Luciferase assays were performed as in Figure 4. For control of protein expression, equal amounts of cell extracts (30  $\mu\text{l}$  for QEF, 60  $\mu\text{l}$  for CEF) were separated by SDS-PAGE (10% wt/vol), and v-Myc, c-Myc and tubulin  $\alpha$  proteins were detected by immunoblotting.



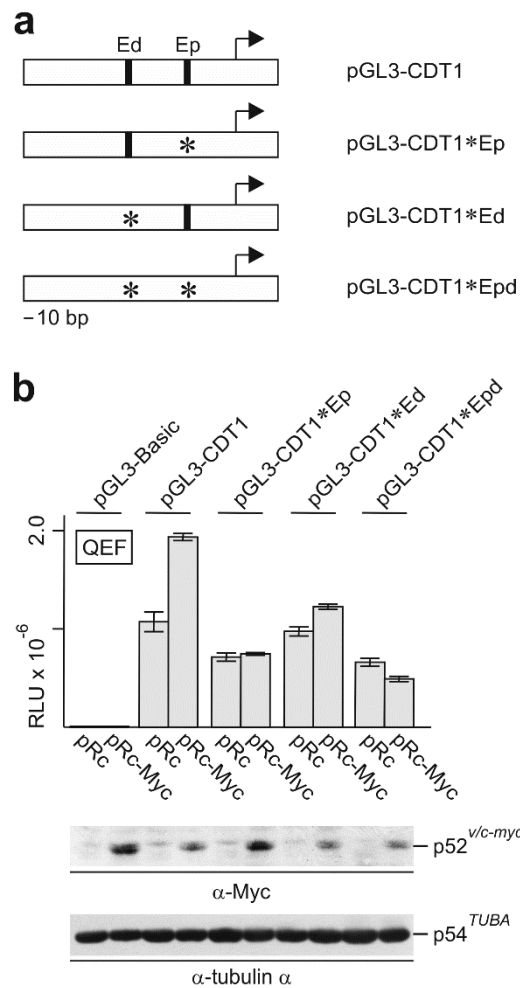

**Supplementary Figure 7.** Mutational analysis of the *CDT1* promoter. **(a)** Structure of the *CDT1* promoter fragments cloned into the luciferase reporter plasmid. The proximal (p), distal (d), or both (pd) canonical E-boxes (CACGTG; cf. Figure 2) were mutated (\*) to GCCGTG. **(b)** Aliquots (2.0  $\mu$ g) of the pGL3-Basic vector, or of the reporter construct pGL3-CDT1 and its mutant derivatives were cotransfected with 2.0- $\mu$ g aliquots of a pRc-derived expression vector encoding the v-Myc protein (pRc-Myc) or of the empty expression vector (pRc), together with the pSV- $\beta$ -galactosidase plasmid (1.0  $\mu$ g) into  $8 \times 10^5$  normal QEF. 24 h after transfection, luciferase activities were determined in triplicate from 10- $\mu$ l aliquots of cell extracts. For control of protein expression, equal amounts of cell extracts (30  $\mu$ l) were separated by SDS-PAGE (10% wt/vol), and v-Myc, c-Myc and tubulin  $\alpha$  proteins were detected by immunoblotting.

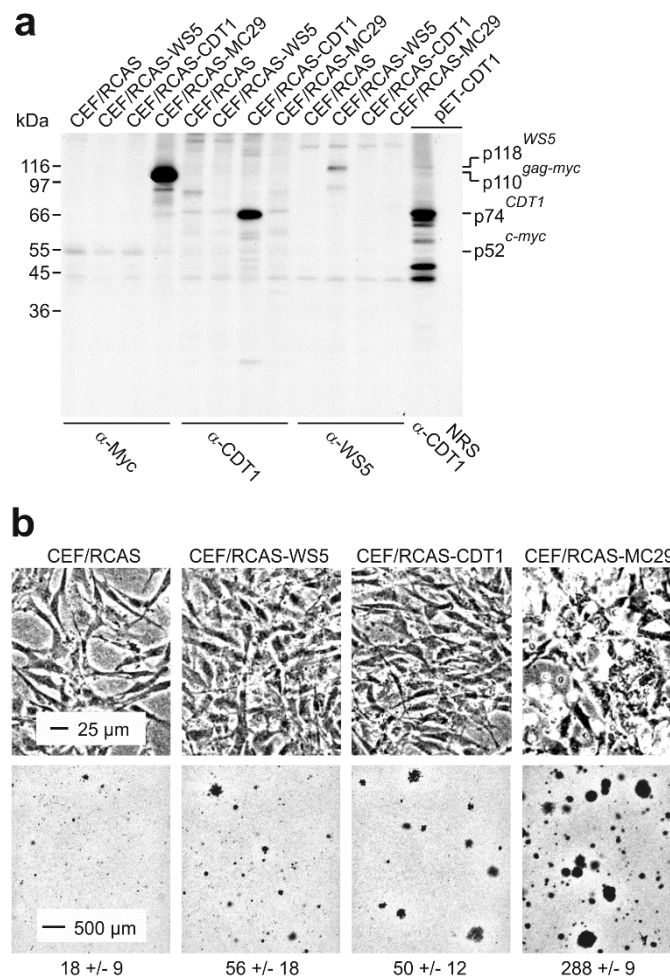

**Supplementary Figure 8.** Transforming activity of ectopically expressed *CDT1* in CEF. **(a)** SDS-PAGE (10% wt/vol) analysis of v-Myc (Gag-Myc), Cdt1, and WS5 proteins ectopically expressed after transfection of CEF with the replication-defective construct pRCAS-MC29 together with pRCAS as a helper virus construct, with the replication-competent constructs pRCAS-CDT1 and pRCAS-WS5, or with pRCAS as a control. Aliquots ( $1 \times 10^7$  cpm) of lysates from cells metabolically labeled with [ $^{35}$ S]methionine were immunoprecipitated with the antisera indicated. *In vitro* translated [ $^{35}$ S]methionine-labeled and immunoprecipitated quail Cdt1 protein encoded by the plasmid pET-CDT1 was used as size control. **(b)** Upper panels: phase-contrast micrographs of CEF transfected with vector DNA (pRCAS), or with the retroviral constructs pRCAS-WS5, pRCAS-CDT1, and pRCAS-MC29/pRCAS. Lower panels: agar colony formation by cells transfected with pRCAS-WS5, pRCAS-CDT1 or pRCAS-MC29/pRCAS. Equal numbers of cells ( $5 \times 10^4$ ) were seeded in soft agar. pRCAS-transfected CEF were used as controls. Bright-field micrographs were taken after 3 weeks. Numbers of colonies/1000 cells seeded are indicated.
